# Supplementary material
Source: PubMed Central journal article supplement (PMC166837)
Supplement: plntphys_131_2_610__1.pdf [file plntphys_131_2_610__1.pdf]

| Gene Name         | At Locus ID | Acc. #     | Small Dataset | Organisms                      |
|-------------------|-------------|------------|---------------|--------------------------------|
| 1 At pc-Myb1      | At4g32730   | AAD46772   | yes           |                                |
| 2 At pc-Myb2      | At4g00540   | AAD46773   | yes           | Am - Antirrhinum majus         |
| 3 At pc-Myb3      | At3g09370   | AAF25950   | yes           | At - Arabidopsis thaliana      |
| 4 At pc-Myb4      | At5g11510   | AAK54739   | yes           | Cr - Chlamydomonas reinhardtii |
| 5 At pc-Myb5      | At5g02320   | AAK54740   | yes           | Os - Oryza sativa              |
| 6 Pp pc-Myb       | n/a         | AAF78887   | yes           | Ph - Petunia hybrida           |
| 7 AmMIXTA         | n/a         | CAA55725   | yes           | Pp - Physcomitrella patens     |
| 8 AtMyb0 (GL1)    | At3g27920   | AAC97387   | yes           | Zm - Zea mays                  |
| 9 AtMyb1          | At3g09230   | AAF14022   | yes           |                                |
| 10 AtMyb2         | At2g47190   | AAB63819   | yes           |                                |
| 11 AtMyb3         | At1g22640   | AAC25522   | yes           |                                |
| 12 AtMyb11        | At3g62610   | CAB83111   | yes           |                                |
| 13 AtMyb12        | At2g47460   | AAC62864   | yes           |                                |
| 14 AtMyb13        | At1g06180   | AAF80215   | yes           |                                |
| 15 AtMyb16        | At5g15310   | CAB89341   | yes           |                                |
| 16 AtMyb18        | At4g25560   | CAA18170   | yes           |                                |
| 17 AtMyb20        | At1g66230   | AAG51765   | yes           |                                |
| 18 AtMyb22        | At5g40430   | AAD53091   | yes           |                                |
| 19 AtMyb29        | At5g07690   | BAB11448   | yes           |                                |
| 20 AtMyb30        | At3g28910   | BAB02134   | yes           |                                |
| 21 AtMyb36        | At5g57620   | AAC83600   | yes           |                                |
| 22 AtMyb39        | At4g17780   | CAB10558   | yes           |                                |
| 23 AtMyb44        | At5g67300   | BAB09015   | yes           |                                |
| 24 AtMyb52        | At1g17950   | AAF97274   | yes           |                                |
| 25 AtMyb53        | At5g65230   | BAB11659   | yes           |                                |
| 26 AtMyb58        | At1g16490   | AAD34700   | yes           |                                |
| 27 AtMyb61        | At1g09540   | AAC33214   | yes           |                                |
| 28 AtMyb75 (pap1) | At1g56650   | AAG09100   | yes           |                                |
| 29 AtMyb90        | At1g66390   | AAG52164   | yes           |                                |
| 30 AtMyb101       | At2g32460   | AAC25928   | yes           |                                |
| 31 AtMyb102       | At4g21440   | CAA20209   | yes           |                                |
| 32 AtMyb106       | At3g01140   | AAF26160   | yes           |                                |
| 33 AtMyb118       | At3g27780   | BAB02701   | yes           |                                |
| 34 AtMyb123       | At5g35550   | BAB08716   | yes           |                                |
| 35 Cr R2R3 Myb    | n/a         | *AV396320  | yes           |                                |
| 36 OsMyb-IF       | n/a         | BAB64029   | yes           |                                |
| 37 OsP            | n/a         | AAL84634   | yes           |                                |
| 38 PhAN2          | n/a         | AAF66727   | yes           |                                |
| 39 PpMyb2         | n/a         | CAA47435   | yes           |                                |
| 40 ZmB2           | n/a         | **AF250185 | yes           |                                |
| 41 ZmC1           | n/a         | P10290     | yes           |                                |
| 42 ZmMyb-IF25     | n/a         | AF521881   | yes           |                                |
| 43 ZmMyb-IF35     | n/a         | AF521880   | yes           |                                |
| 44 ZmP1           | n/a         | AAL24047   | yes           |                                |
| 45 ZmP2           | n/a         | AAG36774   | yes           |                                |
| 46 ZmPI1          | n/a         | AAB67720   | yes           |                                |
| 47 AtMyb4         | At4g38620   | CAB37518   | no            |                                |
| 48 AtMyb7         | At2g16720   | AAD24605   | no            |                                |
| 49 AtMyb9         | At5g16770   | CAC01841   | no            |                                |
| 50 AtMyb14        | At2g31180   | AAD20663   | no            |                                |

|     |          |           |          |    |
|-----|----------|-----------|----------|----|
| 51  | AtMyb17  | At3g61250 | CAB71055 | no |
| 52  | AtMyb19  | At5g52260 | BAA97469 | no |
| 53  | AtMyb25  | At2g39880 | AAB95273 | no |
| 54  | AtMyb27  | At3g53200 | CAB64223 | no |
| 55  | AtMyb31  | At1g74650 | AAG52371 | no |
| 56  | AtMyb32  | At4g34990 | CAA17764 | no |
| 57  | AtMyb33  | At5g06100 | BAA98199 | no |
| 58  | AtMyb37  | At5g23000 | BAB08873 | no |
| 59  | AtMyb38  | At2g36890 | AAD31574 | no |
| 60  | AtMyb40  | At5g14340 | CAB87773 | no |
| 61  | AtMyb41  | At4g28110 | CAB36780 | no |
| 62  | AtMyb45  | At3g48920 | CAB62018 | no |
| 63  | AtMyb46  | At5g12870 | CAB88251 | no |
| 64  | AtMyb47  | At1g18710 | AAF27108 | no |
| 65  | AtMyb48  | At3g46130 | CAB90940 | no |
| 66  | AtMyb49  | At5g54230 | BAB10746 | no |
| 67  | AtMyb51  | At1g18570 | AAF98417 | no |
| 68  | AtMyb54  | At1g73410 | AAG30986 | no |
| 69  | AtMyb55  | At4g01680 | AAC72864 | no |
| 70  | AtMyb57  | At3g01530 | AAF01538 | no |
| 71  | AtMyb62  | At1g68320 | AAG52612 | no |
| 72  | AtMyb63  | At1g79180 | AAC17044 | no |
| 73  | AtMyb64  | At5g11050 | CAC03453 | no |
| 74  | AtMyb65  | At3g11440 | AAG51434 | no |
| 75  | AtMyb66  | At5g14750 | CAC01874 | no |
| 76  | AtMyb67  | At3g12720 | BAB02416 | no |
| 77  | AtMyb68  | At5g65790 | BAB10686 | no |
| 78  | AtMyb69  | At4g33450 | CAB38803 | no |
| 79  | AtMyb70  | At2g23290 | AAB87103 | no |
| 80  | AtMyb76  | At5g07700 | BAB11449 | no |
| 81  | AtMyb77  | At3g50060 | CAB62114 | no |
| 82  | AtMyb78  | At5g49620 | BAB10776 | no |
| 83  | AtMyb79  | At4g13480 | CAB41106 | no |
| 84  | AtMyb80  | At5g56110 | BAB09293 | no |
| 85  | AtMyb81  | At2g26960 | AAF18615 | no |
| 86  | AtMyb83  | At3g08500 | AAG50833 | no |
| 87  | AtMyb84  | At3g49690 | CAB66907 | no |
| 88  | AtMyb88  | At2g02820 | AAC05340 | no |
| 89  | AtMyb92  | At5g10280 | CAB96684 | no |
| 90  | AtMyb93  | At1g34670 | AAD46010 | no |
| 91  | AtMyb94  | At3g47600 | CAB61986 | no |
| 92  | AtMyb95  | At1g74430 | AAG52356 | no |
| 93  | AtMyb96  | At5g62470 | BAB11497 | no |
| 94  | AtMyb97  | At4g26930 | CAB36539 | no |
| 95  | AtMyb98  | At4g18770 | CAB37462 | no |
| 96  | AtMyb100 | At2g25230 | AAD23668 | no |
| 97  | AtMyb103 | At1g63910 | AAG52460 | no |
| 98  | AtMyb104 | At2g26950 | AAF18614 | no |
| 99  | AtMyb105 | At1g69560 | AAG60101 | no |
| 100 | AtMyb107 | At3g02940 | AAF26965 | no |
| 101 | AtMyb108 | At3g06490 | AAG51322 | no |
| 102 | AtMyb109 | At3g55730 | CAB81598 | no |
| 103 | AtMyb111 | At5g49330 | BAB10351 | no |

|     |              |           |          |    |
|-----|--------------|-----------|----------|----|
| 104 | AtMyb112     | At1g48000 | AAG51527 | no |
| 105 | AtMyb113     | At1g66370 | AAG52158 | no |
| 106 | AtMyb114     | At1g66380 | AAG52160 | no |
| 107 | AtMyb115     | At5g40360 | BAB11591 | no |
| 108 | AtMyb116     | At1g25340 | AAG28818 | no |
| 109 | AtMyb117     | At1g26780 | AAF87032 | no |
| 110 | AtMyb118     | At3g27780 | BAB02701 | no |
| 111 | AtMyb119     | At5g58850 | BAB09630 | no |
| 112 | AtMyb120     | At5g55020 | BAB10576 | no |
| 113 | AtMyb122     | At1g74080 | AAG52518 | no |
| 114 | AtMyb124     | At1g14350 | AAF43935 | no |
| 115 | not assigned | At3g12820 | AAL83584 | no |
| 116 | not assigned | At3g13540 | X90380   | no |
| 117 | not assigned | At3g23250 | CAA62032 | no |
| 118 | not assigned | At3g24310 | AAB38777 | no |
| 119 | not assigned | At3g28470 | AAC83599 | no |
| 120 | not assigned | At3g30210 | AAK54743 | no |
| 121 | not assigned | At3g60460 | CAB81832 | no |
| 122 | not assigned | At4g37780 | AAC83616 | no |
| 123 | not assigned | At5g16600 | AAD53090 | no |
| 124 | not assigned | At5g26655 | AAC13592 | no |
| 125 | not assigned | At5g59780 | AAC83616 | no |
| 126 | not assigned | At5g61420 | AAD53103 | no |
| 127 | not assigned | At5g62320 | AAF00581 | no |

\*partial EST sequence used for contig assembly

\*\*full length myb domain sequence available upon request
