# Supplementary material
Source: PubMed Central journal article supplement (PMC166837)

46

Consensus tree found by Bayesian Analysis with WAG + model

- 8000 trees sampled by Markov chain.
- Bipartitions found in < 50% of trees not shown, branches collapsed.

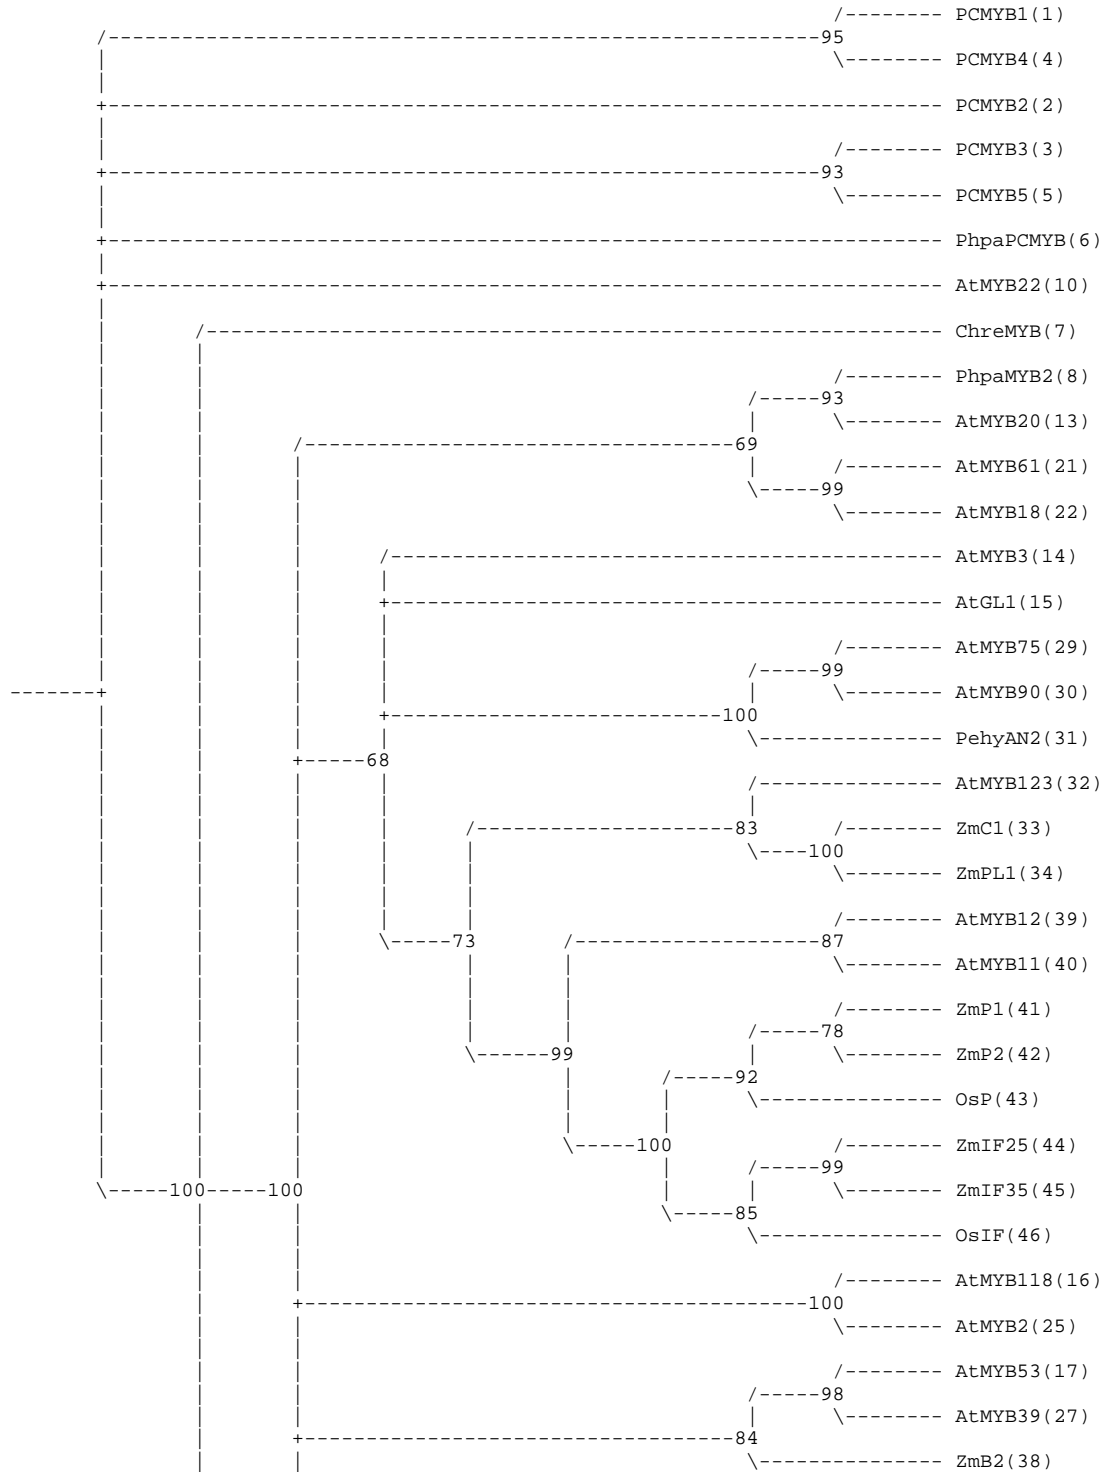

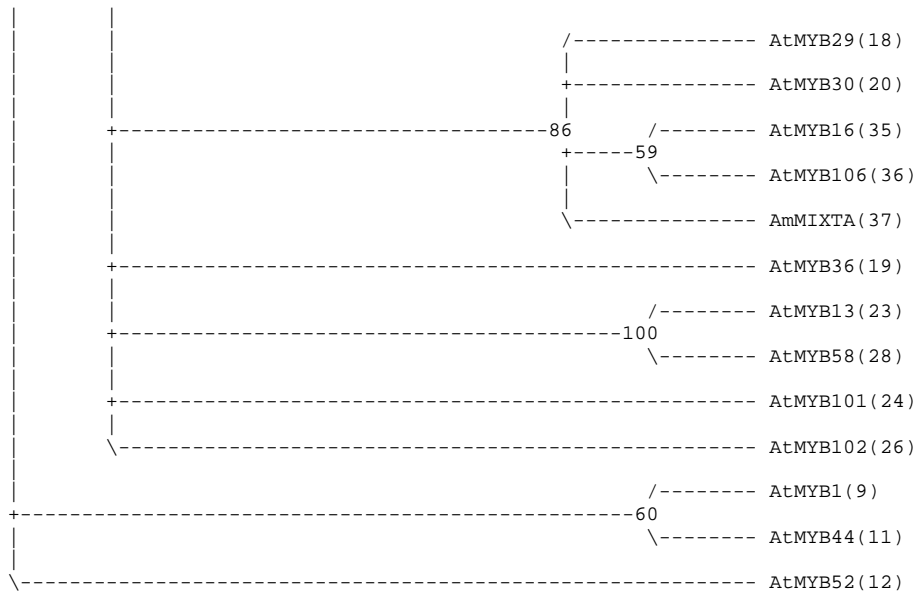

## Consensus tree found by Bayesian Analysis with WAG + model

- 8000 trees sampled by Markov chain.
- Bipartitions found in < 50% of trees not shown, branches collapsed.

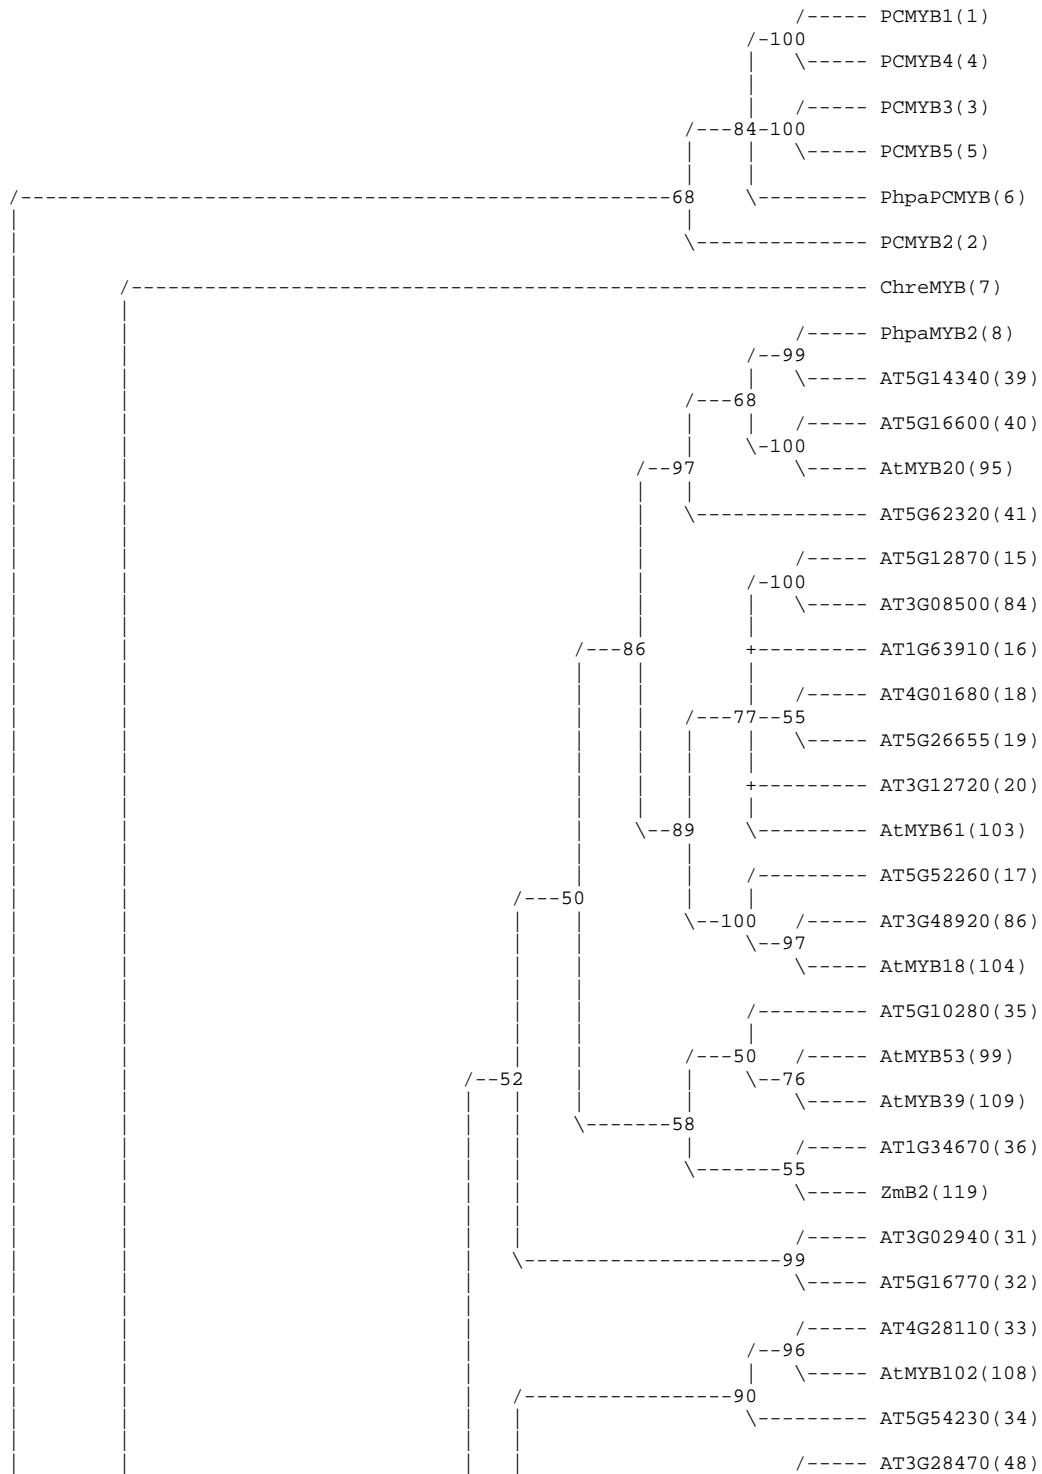

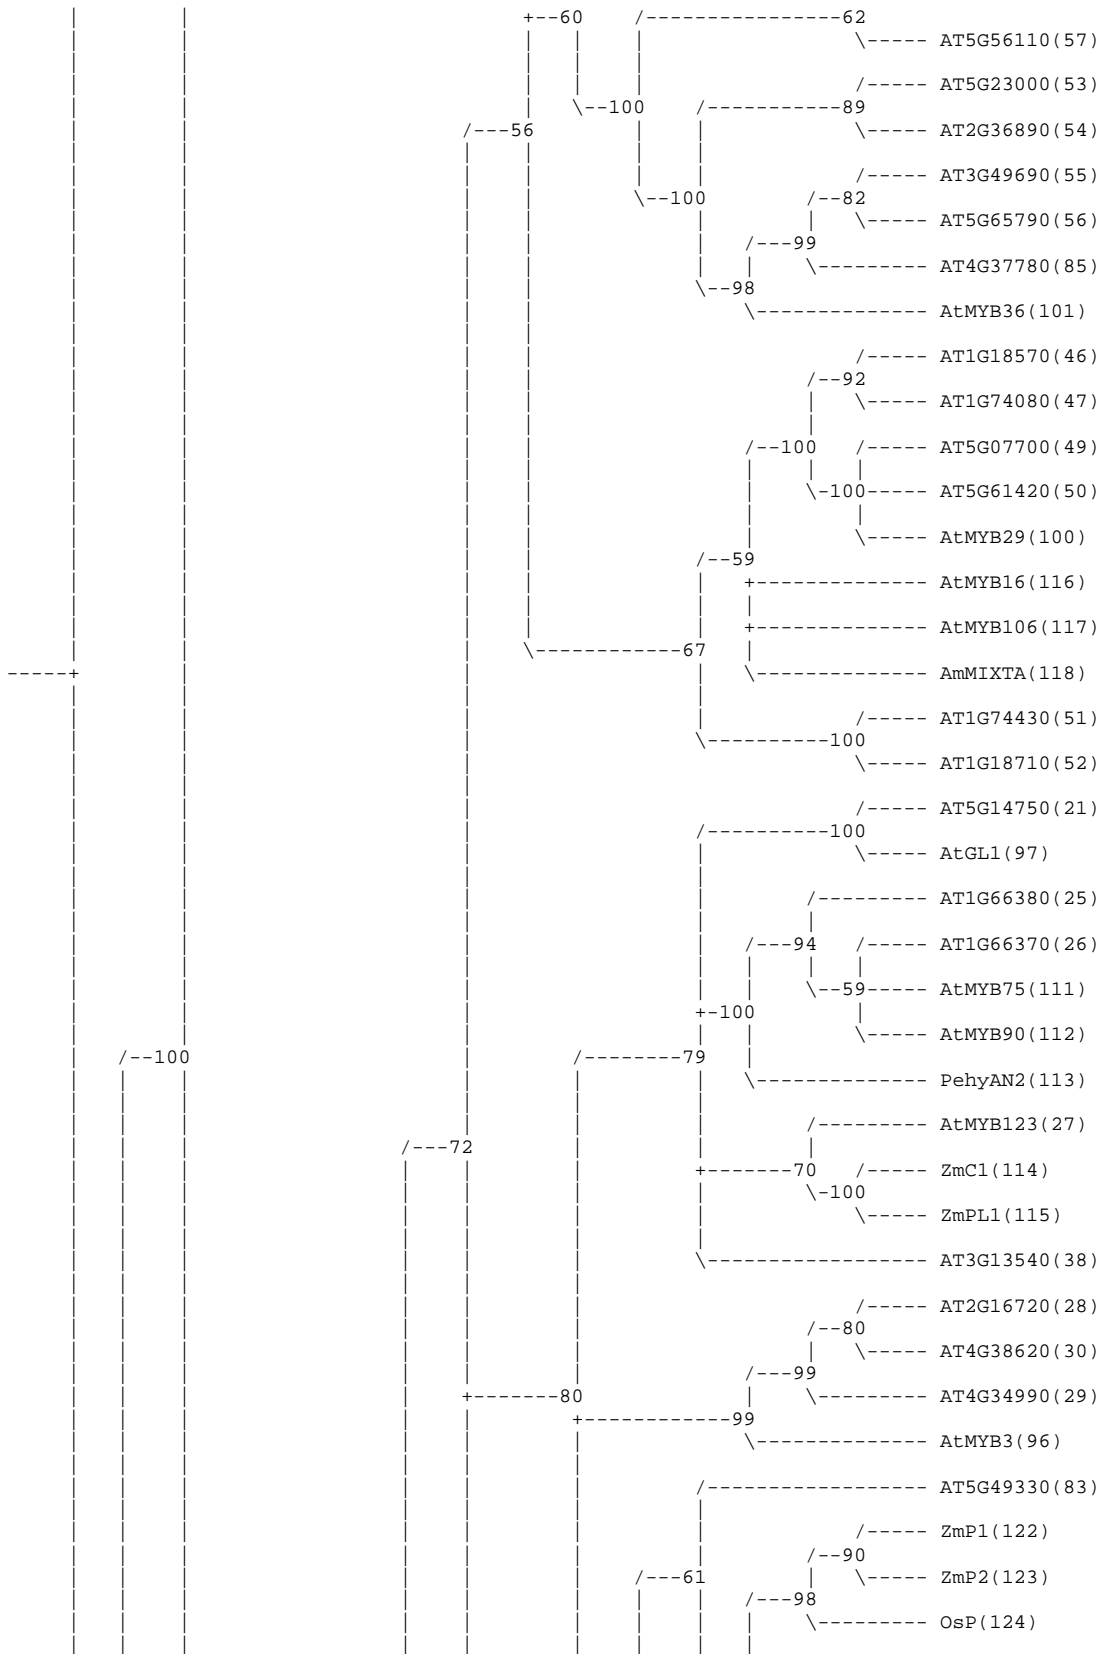

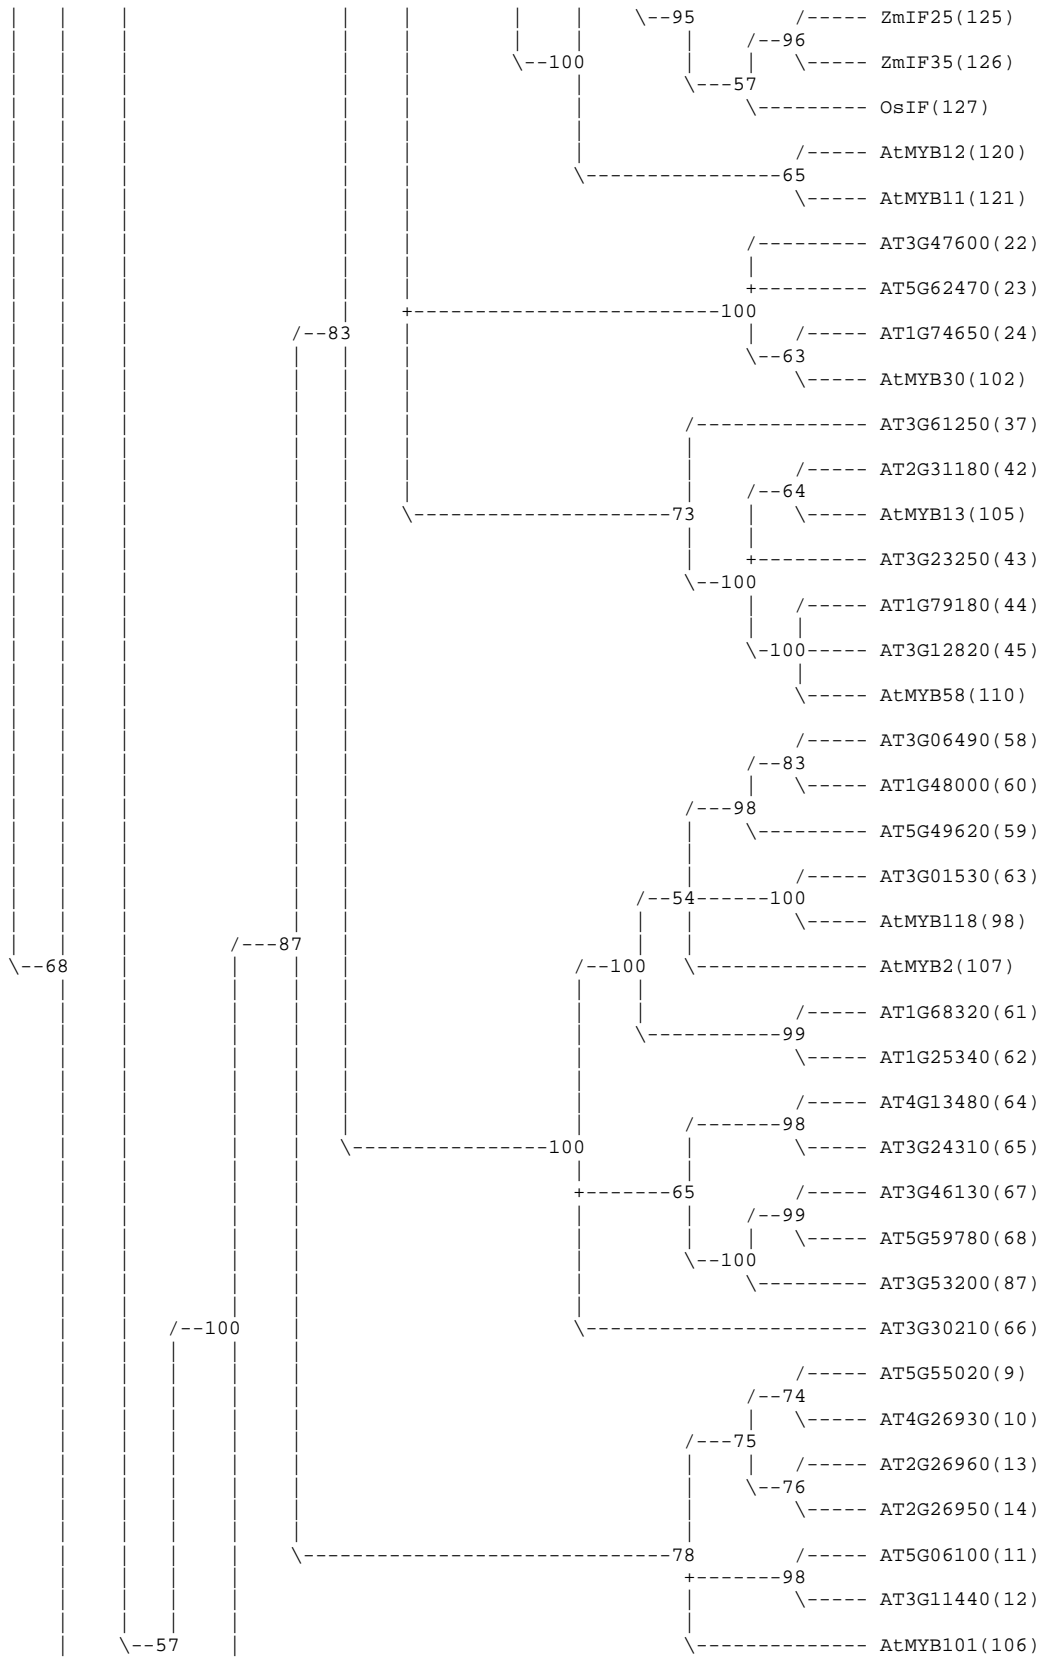

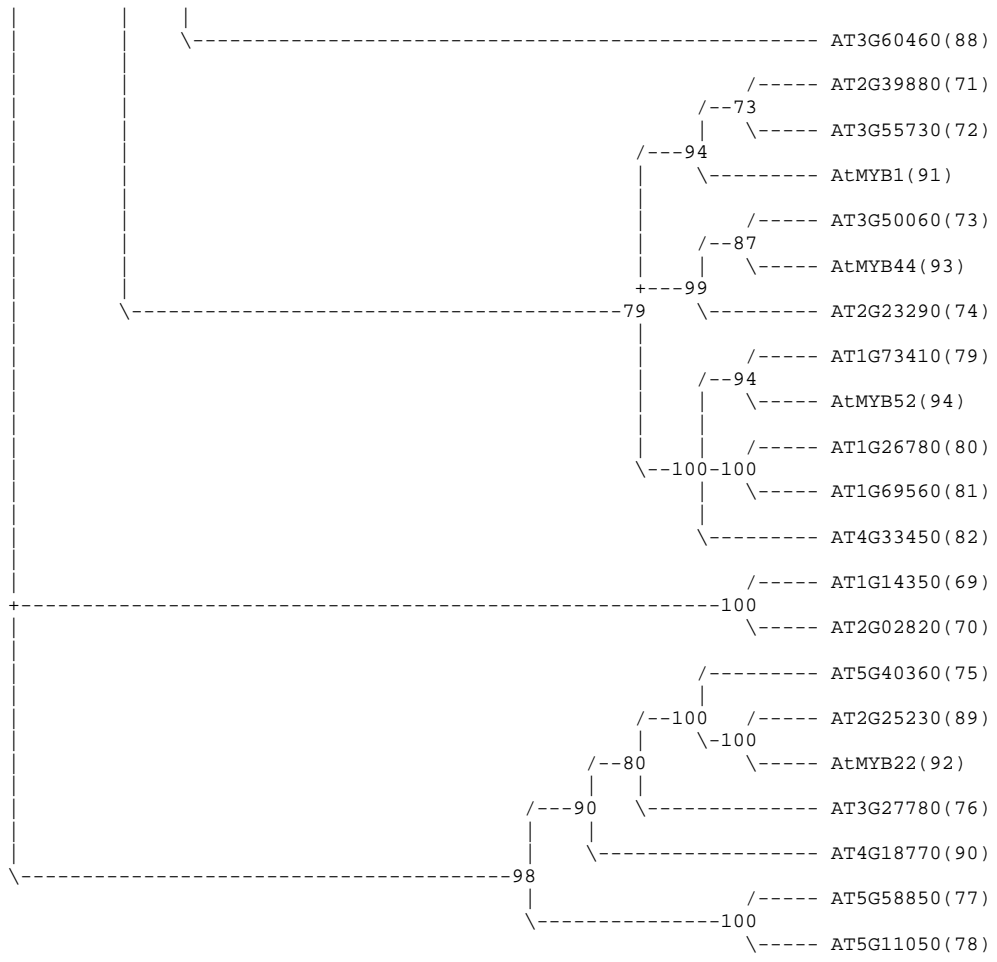

46

Bootstrap Consensus Tree – Weighted Neighbor Joining of WAG + distances

- 500 bootstrap replicates.
- Bootstrap proportions < 50% not shown, branches collapsed.

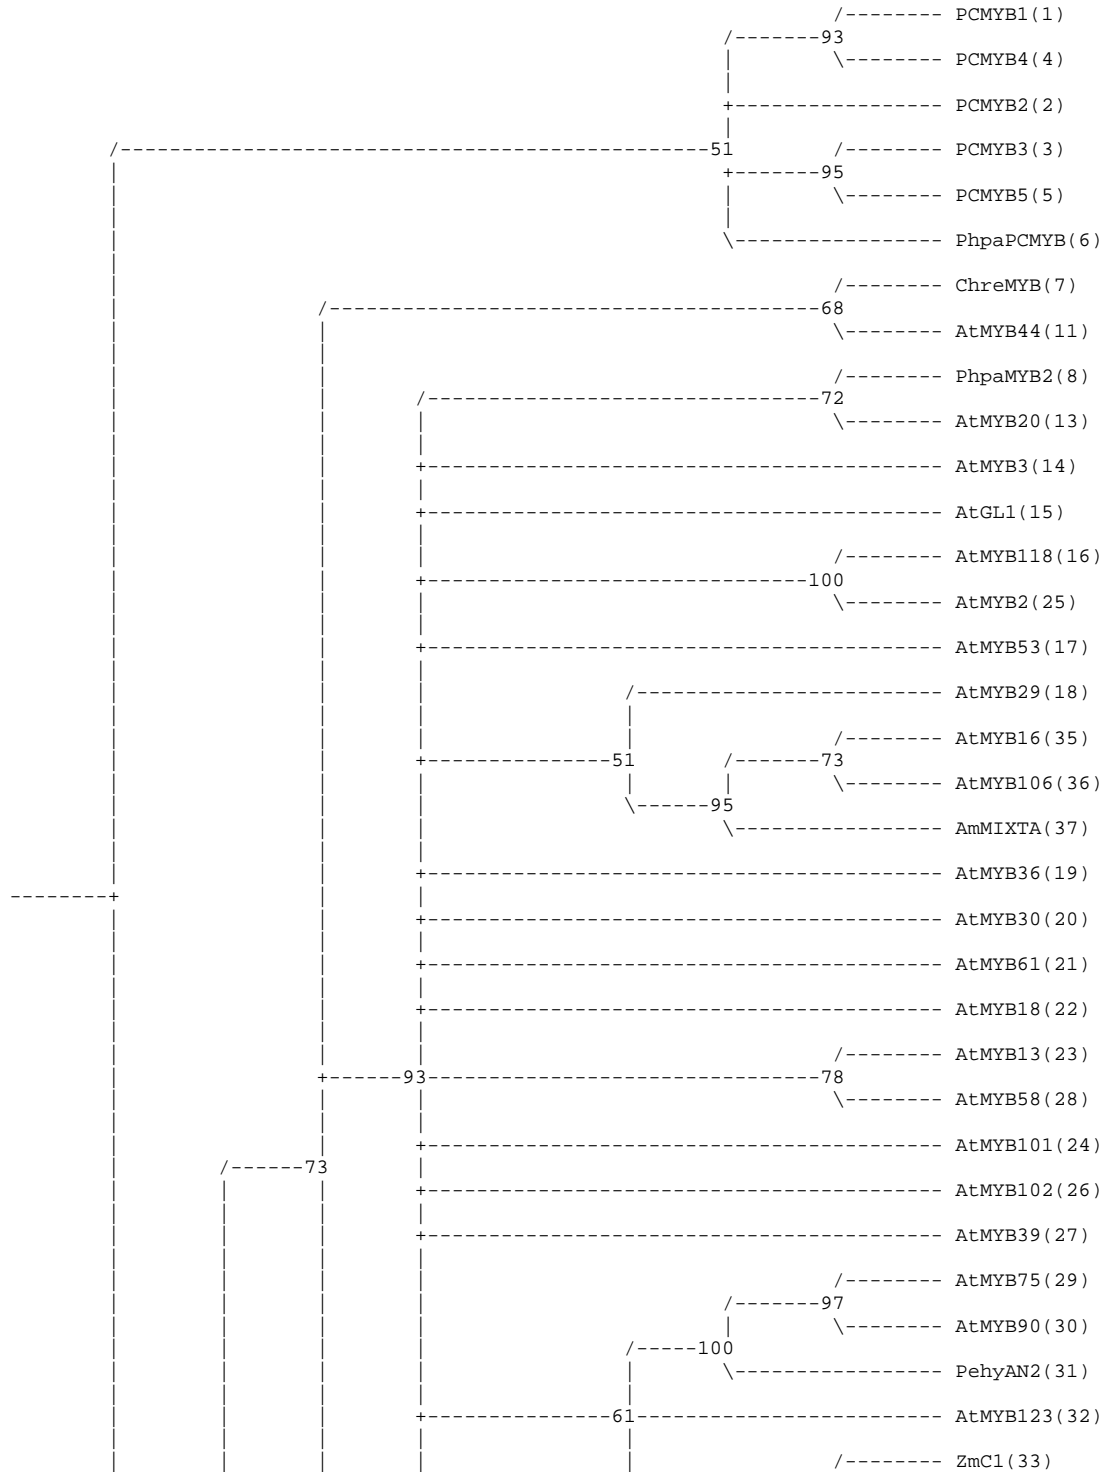

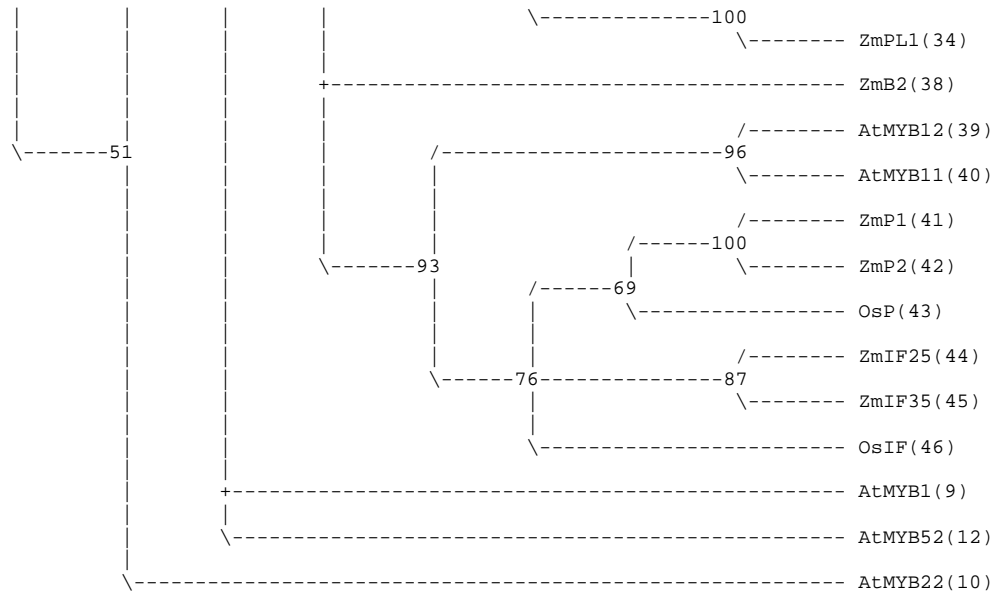



127

Bootstrap Consensus Tree – Weighted Neighbor Joining of WAG + distances

- 500 bootstrap replicates.
- Bootstrap proportions < 50% not shown, branches collapsed.

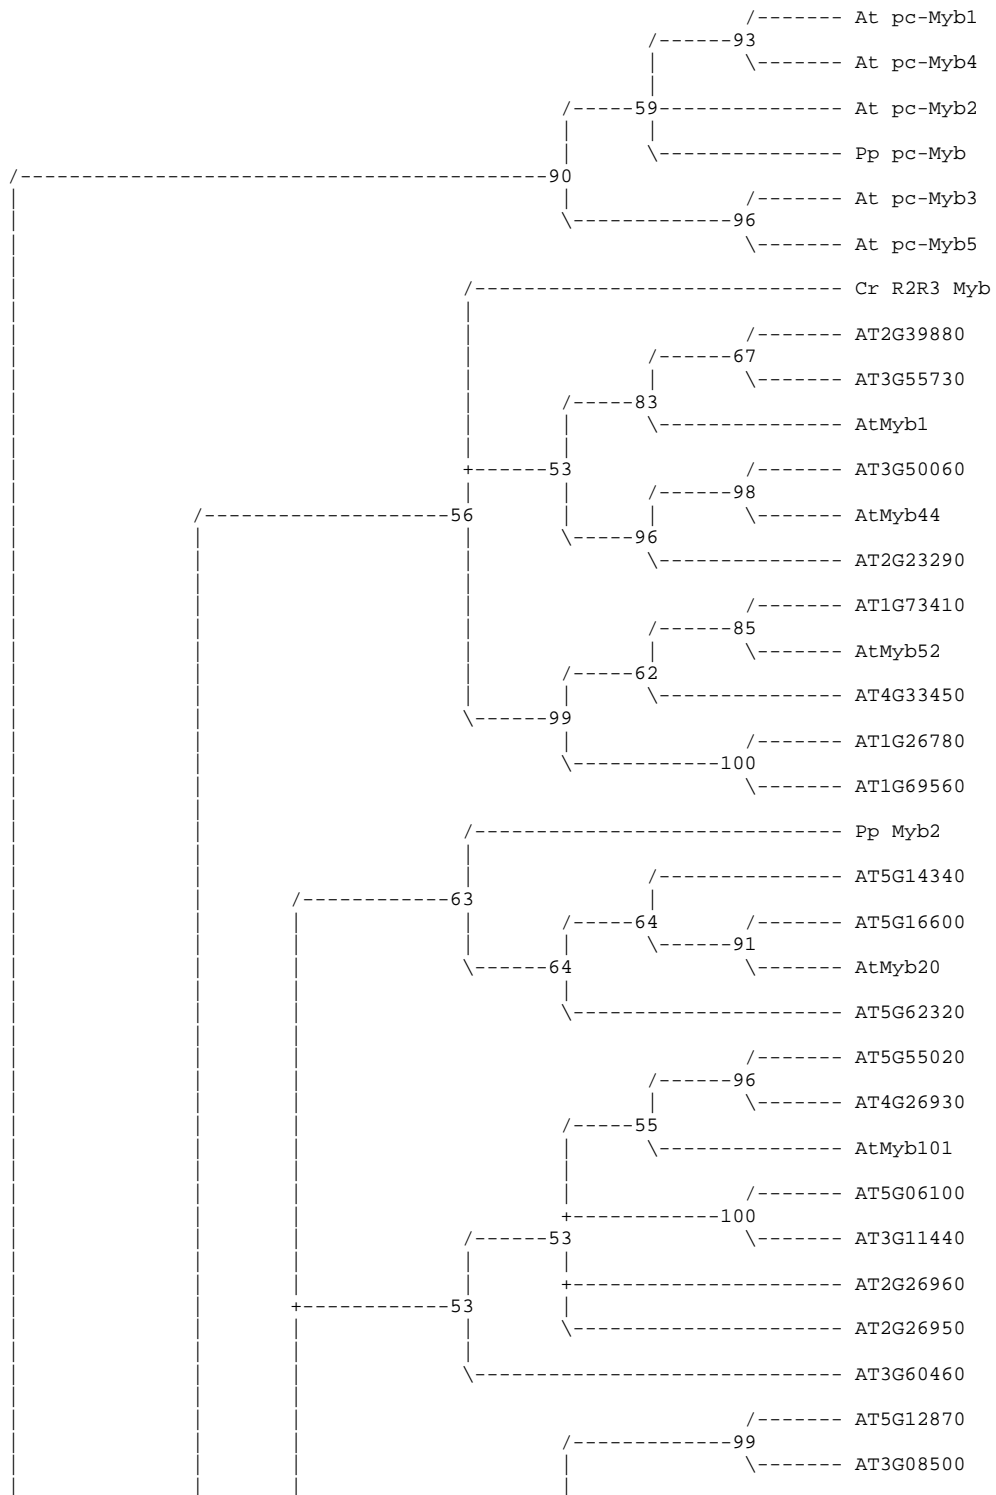

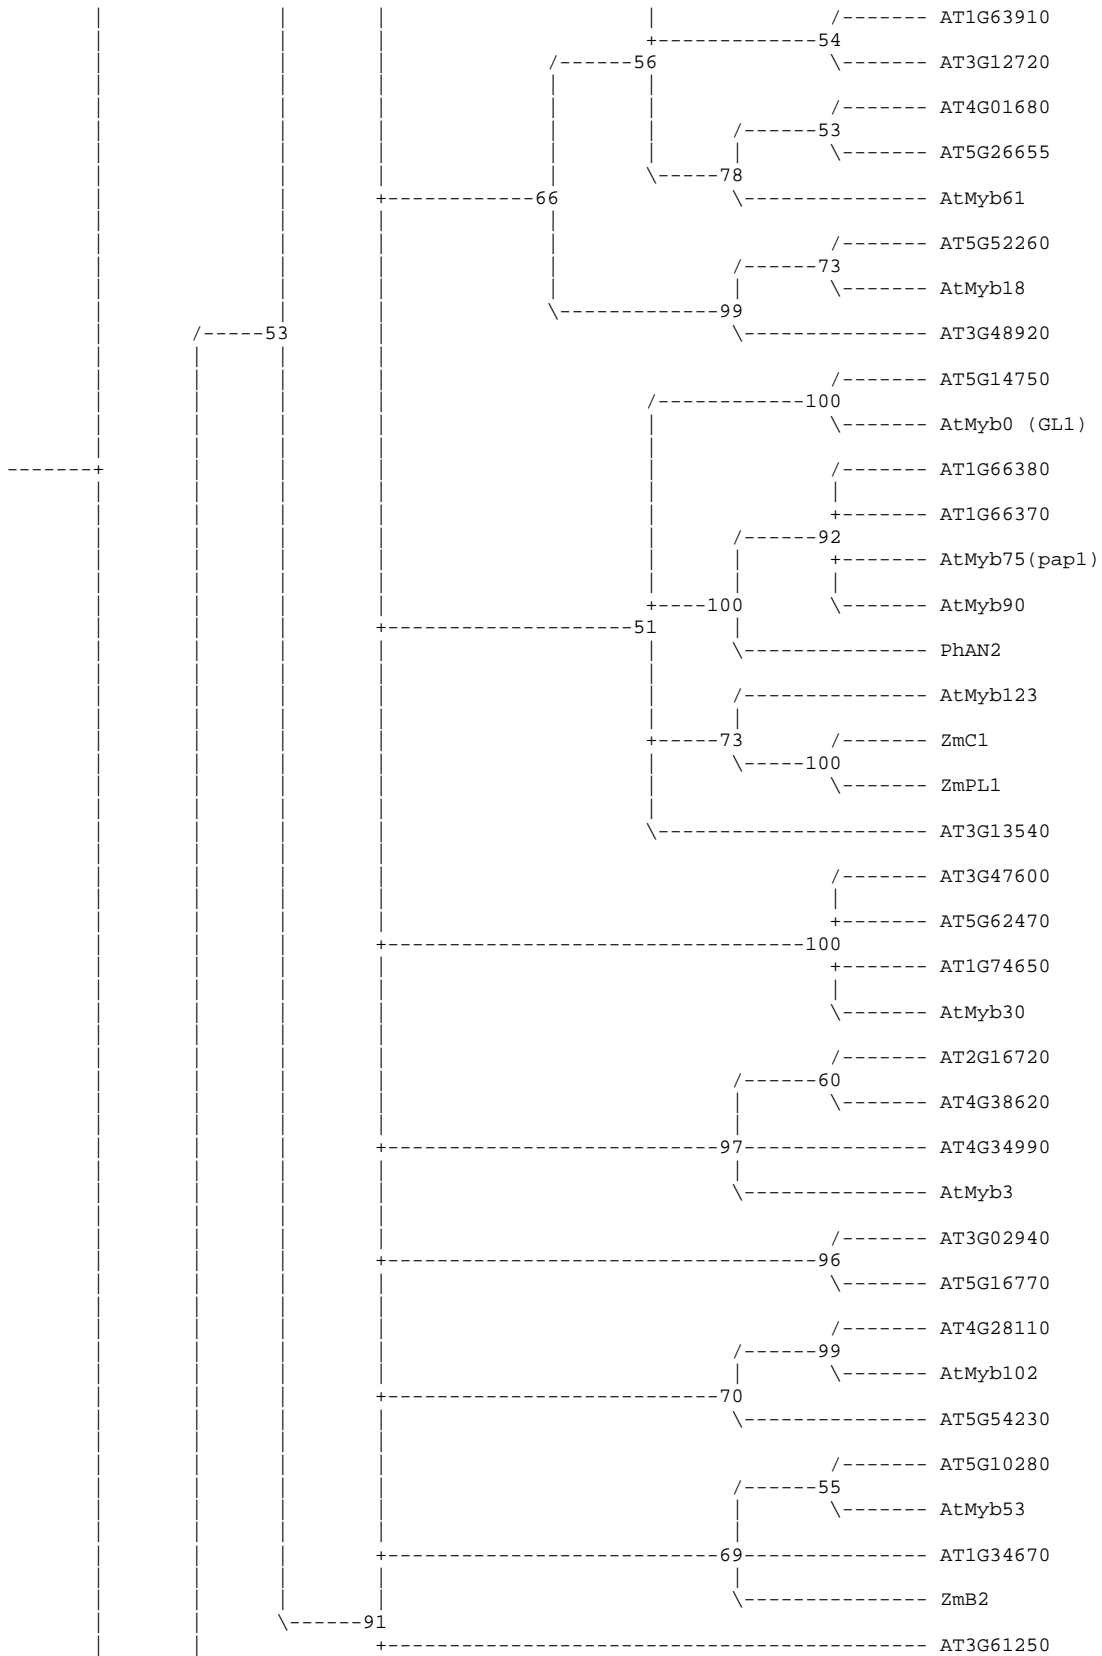

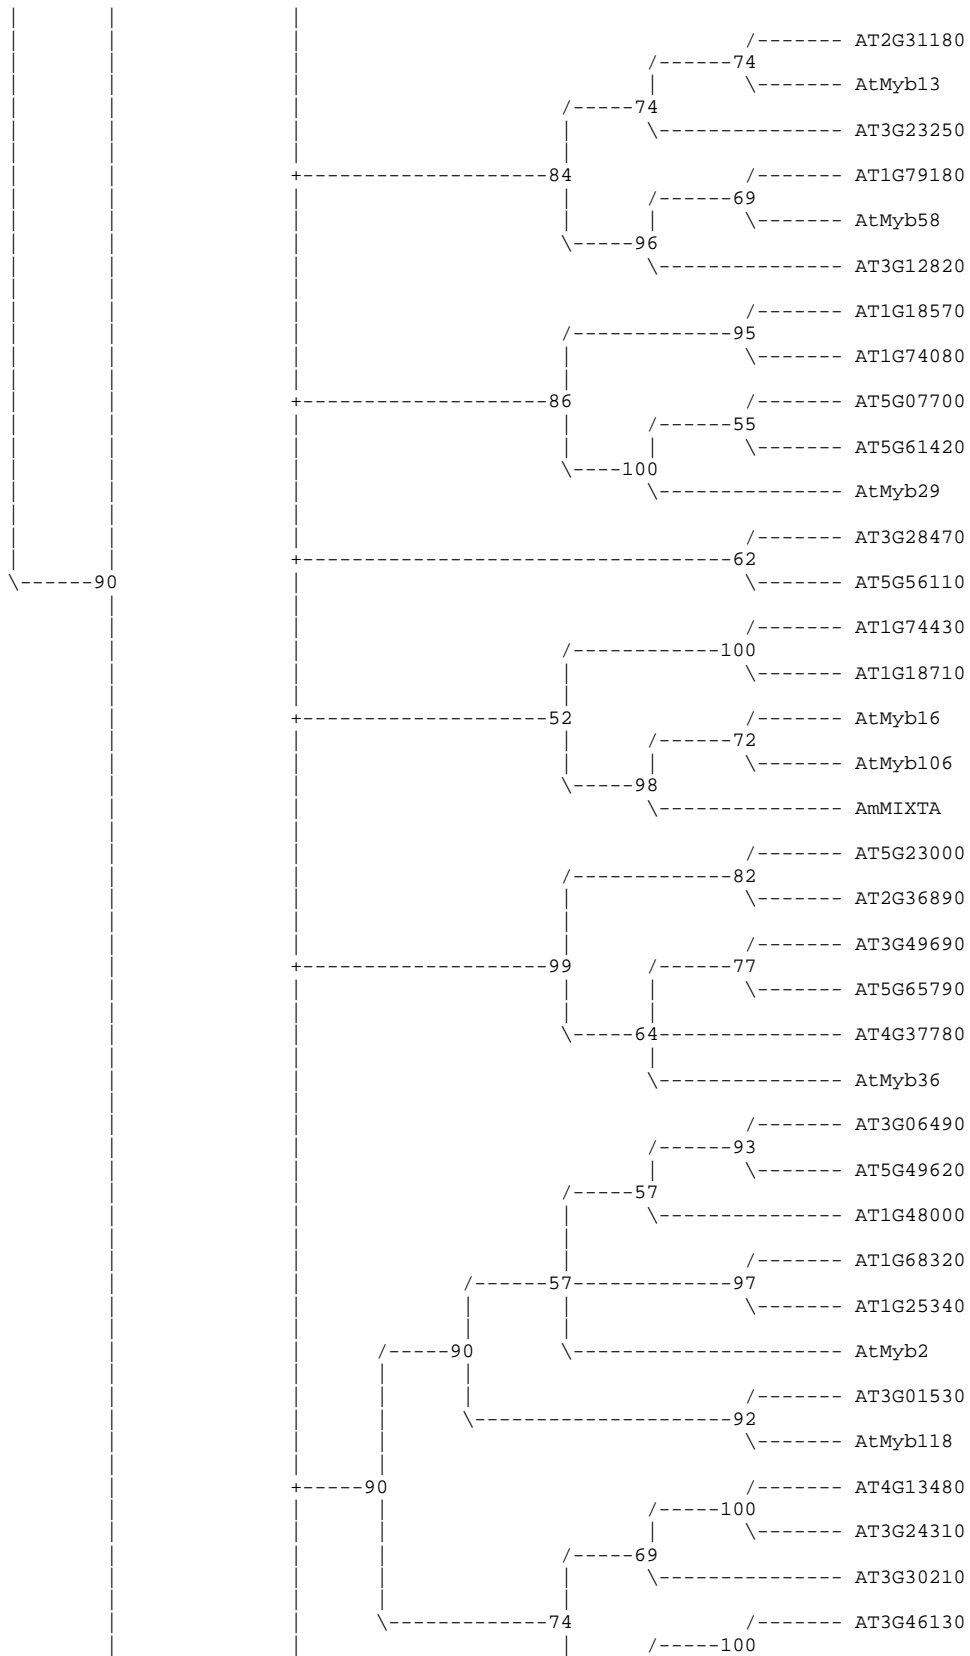

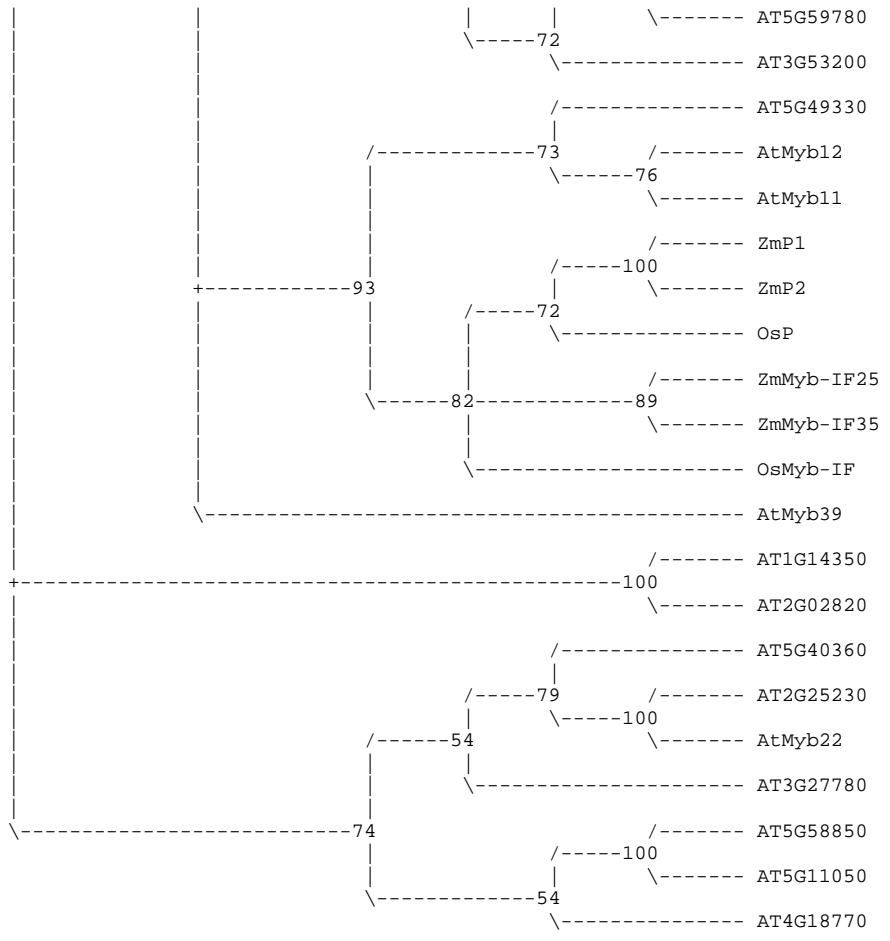

Supplement: plntphys_131_2_610__2.pdf [file plntphys_131_2_610__2.pdf]
